# ORDER FORM

## JOURNAL SUBSCRIPTION

PLEASE COMPLETE AND FAX/SEND THIS FORM TO:

De Gruyter  
 Tanja Schneider  
 Genthiner Str. 13  
 10785 Berlin  
 Germany  
 Fax: +49-(0)30 · 2 60 05 · 322

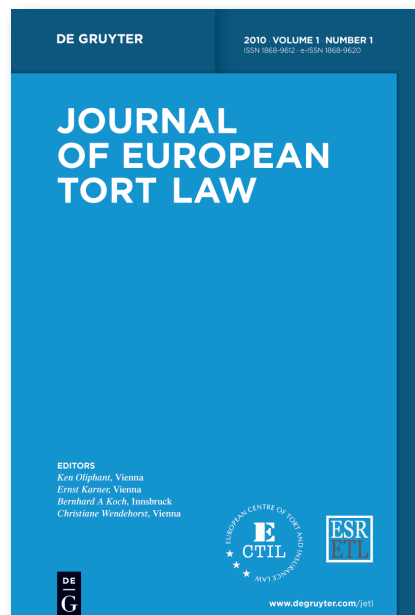

Please enter my subscription for

### JETL – JOURNAL OF EUROPEAN TORT LAW

ISSN 1868-9612. e-ISSN 1868-9620  
 beginning in 2010

- Print + Online** € 228.00 plus € 7.50 postage  
 (delivery within Germany)
- Print + Online** € 228.00 plus € 15.00 postage  
 (delivery to other countries)
- Print only** € 208.00 plus € 7.50 postage  
 (delivery within Germany)
- Print only** € 208.00 plus € 15.00 postage  
 (delivery to other countries)
- Online only** € 208.00

I opt for the following access method for the online version:

- user name/password (sent to me by e-mail)
- IP number identification (only for institutions)

This is my  private address  corporate address

\_\_\_\_\_  
 Name

\_\_\_\_\_  
 Company/Institution

\_\_\_\_\_  
 Street

\_\_\_\_\_  
 City

\_\_\_\_\_  
 ZIP code

\_\_\_\_\_  
 Country

\_\_\_\_\_  
 Phone

\_\_\_\_\_  
 Fax

\_\_\_\_\_  
 E-mail

My method of payment  by invoice  by credit card

MasterCard  Visa  American Express

\_\_\_\_\_  
 Credit card no.

\_\_\_\_\_/\_\_\_\_\_  
 Expiry date

\_\_\_\_\_  
 Card verification value

\_\_\_\_\_  
 Date Signature

If any online versions are offered above, the offer refers to single-user licenses. If you are interested in buying a multi-user license, please indicate this on the form. We will treat this as a request and submit a quotation to you.

I have read and accept the General Terms and Conditions ([www.degruyter.de/files/down/agb\\_e.pdf](http://www.degruyter.de/files/down/agb_e.pdf)). My data is stored by Walter de Gruyter GmbH & Co. KG only for the purpose of this order. The transfer of this data to third parties is excluded.

\_\_\_\_\_  
 Date Signature
